# Supplementary material
Source: PubMed Central journal article supplement (PMC4689339)
Supplement: supp_M063453_jlrM063453_Supplementary_Table_1.pdf [file supp_M063453_jlrM063453_Supplementary_Table_1.pdf]

### Supplementary 1. Primary antibodies used in this study.

| Antibody                 | Vender                 | Catalog #   | Host species | Application | Dilution           |
|--------------------------|------------------------|-------------|--------------|-------------|--------------------|
| APOL1                    | Sigma                  | HPA018885   | rabbit       | WB          | 1:1,000            |
| APOL1                    | Epitomics              | 3245-1      | rabbit       | WB/IF       | 1:1,000            |
| APOL1                    | Novus                  | 8542        | mouse        | WB          | 1:1,000            |
| APOL1                    | Lampire                | customized  | rabbit       | Co-IP/WB/IF | 5:2*/1:3,000/1:500 |
| APOA1                    | Cell Signaling         | #3352       | mouse        | WB/IF       | 1:500/1:100        |
| HPR                      | Abcam                  | ab168213    | mouse        | WB          | 1:500              |
| HPR                      | Abcam                  | ab151752    | rabbit       | IF          | 1:100              |
| Complement C3            | Complement Technology  | A213        | goat         | WB          | 1:2,500            |
| Fibronectin              | R&D Systems            | MAB1918     | mouse        | WB          | 1:500              |
| IgM                      | Jackson ImmunoResearch | 109-005-043 | goat         | ELISA       | 1:3,000            |
| $\alpha$ 2-macroglobulin | Abcam                  | ab36995     | mouse        | WB          | 1:2,000            |
| Thrombin                 | R&D Systems            | AF1148      | goat         | WB          | 1:1,000            |
| Complement C5            | Jackson ImmunoResearch | A220        | goat         | WB          | 1:500              |
| Complement C1r           | Abcam                  | ab171778    | mouse        | WB          | 1:500              |
| APOE                     | Abcam                  | ab1906      | mouse        | WB          | 1:500              |
| Clusterin                | R&D systems            | AF2937      | goat         | WB          | 1:1,000            |
| CFH                      | Complement Technology  | A237        | goat         | WB          | 1:1,000            |
| Complement C4            | Complement Technology  | A205        | goat         | WB          | 1:25,000           |
| Thrombospondin           | Life Technologies      | 399300      | mouse        | WB          | 1:500              |
| PORS1                    | R&D Systems            | AF4036      | goat         | WB          | 1:500              |
| WT1                      | Thermo                 | Ms-1837-s   | mouse        | IF          | 1:100              |
| DPP4/CD26                | BD Biosciences         | 555435      | mouse        | IF          | 1:100              |

WB, Western blot; IF, immunofluorescence; Co-IP, co-immunoprecipitation; ELISA, enzyme-linked immunosorbent assay. HPR, haptoglobin-related protein; CFR, complement factor F; PORS1, vitamin K-dependent protein S; WT1, Wilms tumor protein (renal glomerular podocyte marker); DPP4, dipeptidyl peptidase 4 (renal proximal tubular cell marker).

\*Volume ratio between Lampire APOL1 antibody and the tested serum/FPLC peak fractions (complex A or B).
